# Supplementary material for: Disrupted and Restored Patient Experience With Transition to New Electronic Health Record System
Source: PubMed Central journal article supplement — J Patient Exp. 2021 Aug 18;8:23743735211034064. doi: 10.1177/23743735211034064 (PMC8377307; doi:10.1177/23743735211034064), 2021-08-18
Supplement: sj-pdf-1-jpx-10.1177_23743735211034064.pdf [file sj-pdf-1-jpx-10.1177_23743735211034064.pdf]

1 Supplemental Figure 1. Adjusted Quarter-Specific Effect of the Association Between EHR Implementation and Patient Experience Outcomes from Full Model.

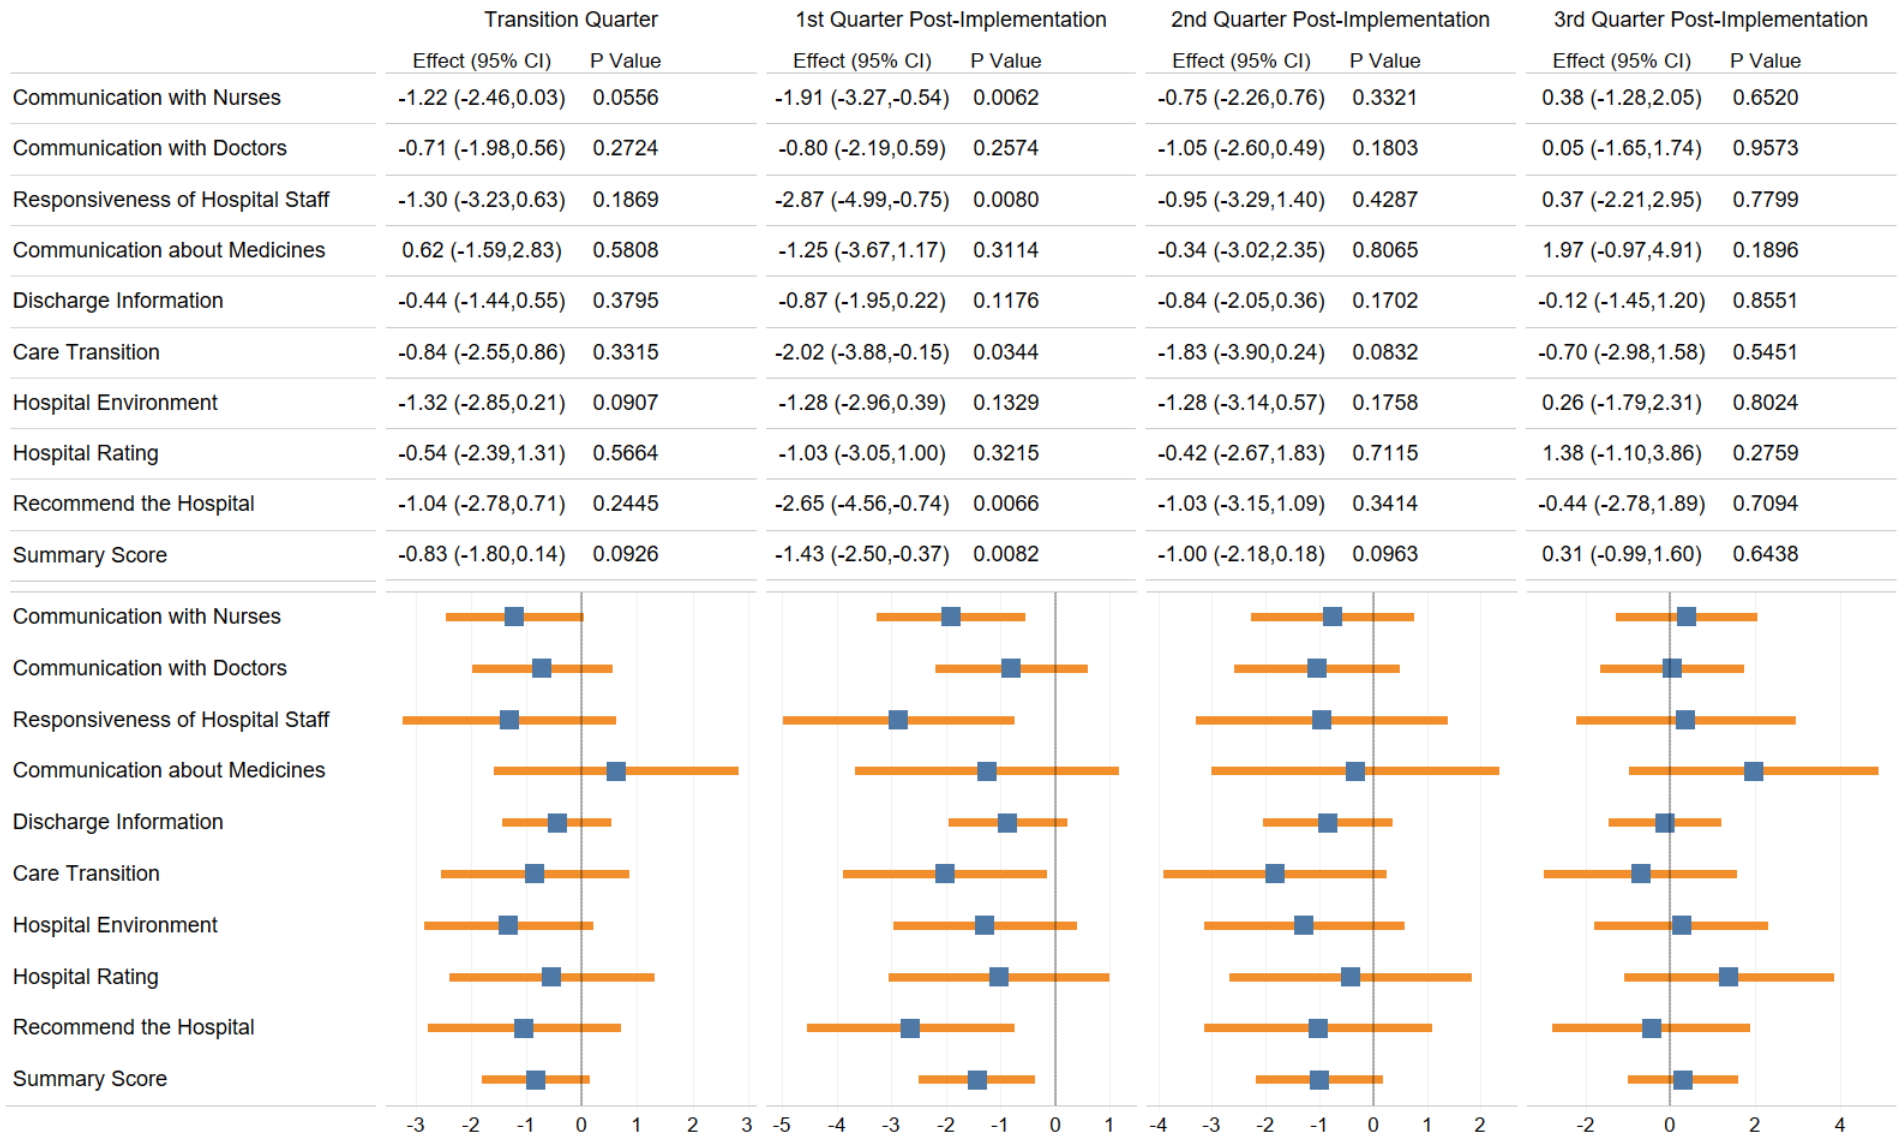

2

3 Notes: Effects were based on random effect linear model adjusting for temporal trends, seasonality, patient characteristics in Table 2 and random intercept for inpatient unit nested  
 4 in hospital. Forest plots demonstrated point estimate with 95% CI of quarter-specific effect.
